1 **Title:** Molecular characterization of *Chlamydomonas reinhardtii* telomeres and  
2 telomerase mutants

3

4 **Authors:** Stephan Eberhard<sup>1,\*</sup>, Sona Valuchova<sup>3</sup>, Julie Ravat<sup>1</sup>, Pascale Jolivet<sup>2</sup>, Sandrine  
5 Bujaldon<sup>1</sup>, Stéphane D. Lemaire<sup>2</sup>, Francis-André Wollman<sup>1</sup>, Maria Teresa Teixeira<sup>2</sup>, Karel  
6 Riha<sup>3</sup> and Zhou Xu<sup>2,4\*</sup>

7

8 **Affiliations**

9 <sup>1</sup>Sorbonne Université, CNRS, UMR7141, Institut de Biologie Physico-Chimique, Laboratoire  
10 de Physiologie Moléculaire et Membranaire du Chloroplaste, F-75005 Paris, France

11 <sup>2</sup>Sorbonne Université, PSL Research University, CNRS, UMR8226, Institut de Biologie  
12 Physico-Chimique, Laboratoire de Biologie Moléculaire et Cellulaire des Eucaryotes, F-  
13 75005 Paris, France

14 <sup>3</sup>Central European Institute of Technology, Masaryk University, 625 00 Brno, Czech  
15 Republic

16 <sup>4</sup>Present address: Sorbonne Université, CNRS, UMR7238, Institut de Biologie Paris-Seine,  
17 Laboratory of Computational and Quantitative Biology, F-75005 Paris, France.

18

19 \***Correspondence:** Stephan Eberhard ([stephan.eberhard@ibpc.fr](mailto:stephan.eberhard@ibpc.fr)), Zhou Xu  
20 ([zhou.xu@sorbonne-universite.fr](mailto:zhou.xu@sorbonne-universite.fr)); Twitter: @Zhou\_Xu\_)

21

22 **Running Title:** *Chlamydomonas* telomeres and telomerase mutants

23

24

25

26 **ABSTRACT**

27           Telomeres are repeated sequences found at the end of the linear chromosomes of most  
28 eukaryotes and are required for chromosome integrity. They shorten with each cell division  
29 because of the end-replication problem. Expression of the reverse transcriptase telomerase  
30 allows for extension of telomeric repeats to counteract telomere shortening. Although  
31 *Chlamydomonas reinhardtii*, a photosynthetic unicellular green alga, is widely used as a  
32 model organism in photosynthesis and flagella research, and for biotechnological  
33 applications, the biology of its telomeres has not been investigated in depth. Here, we show  
34 that the *C. reinhardtii* (TTTTAGGG)<sub>n</sub> telomeric repeats are mostly non-degenerate and that  
35 the telomeres form a protective structure, ending with a 3' overhang. While telomere size and  
36 length distributions are stable under various standard growth conditions, they vary  
37 substantially between 12 genetically close reference strains. Finally, we identify *CrTERT*, the  
38 gene encoding the catalytic subunit of telomerase and show that mutants of this gene display  
39 an “ever shortening telomere” phenotype and eventually enter replicative senescence,  
40 demonstrating that telomerase is required for long-term maintenance of telomeres in *C.*  
41 *reinhardtii*.

42

43 **Keywords:** *Chlamydomonas reinhardtii*, telomeres, telomerase

44

45

## 46 INTRODUCTION

47           Photosynthetic algae are in the highlight of basic and applied research, not only  
48 because of their core role for Earth's biosphere in oxygen evolution and carbon fixation, but  
49 also because of their increased use in biotechnology for the production of proteins, bulk  
50 chemicals and high-value molecules (Scaife et al., 2015; Scranton et al., 2015). Thus, a  
51 detailed understanding of algal physiology, including their cell cycle, cell growth and genome  
52 integrity, is of critical importance. *Chlamydomonas reinhardtii*, also referred to as the  
53 "photosynthetic yeast" (Rochaix, 1995), is the most prominent model organism in the green  
54 algae lineage and is widely used for biotechnological applications as well as to study  
55 fundamental processes, such as photosynthesis and cilia structure and function (Harris, 2001;  
56 Sasso et al., 2018).

57           In eukaryotes, telomeres are repeated sequences found at the extremities of linear  
58 chromosomes. They are important for chromosome integrity and may limit cell proliferation  
59 capacity in some organisms. By progressively shortening with each cell cycle because of the  
60 end-replication problem, telomeres eventually become too short and trigger a cell cycle arrest  
61 termed replicative senescence (Harley et al., 1990; Lundblad and Szostak, 1989). Most  
62 unicellular eukaryotes and germ, stem and cancer cells in multicellular organisms, counteract  
63 telomere shortening by expressing telomerase, an enzyme that adds *de novo* telomere  
64 sequences and allows for an unlimited proliferation potential (Pfeiffer and Lingner, 2013; Wu  
65 et al., 2017). Despite the crucial functions of telomeres and telomerase in maintaining genome  
66 stability and controlling cell proliferation in many model organisms including plants, ciliates,  
67 fungi and mammals (Fulcher et al., 2014), telomere biology in algae remains to be  
68 investigated in depth.

69           To our knowledge, only a handful of studies on *C. reinhardtii* telomeres have been  
70 published. Early studies published in the 90s showed that: (i) *C. reinhardtii* telomeres are  
71 composed of TTTTAGGG repeats, which are different from the *Arabidopsis*-type TTTAGGG  
72 sequence (Petracek et al., 1990); (ii) the size of cloned telomeric repeats ranges from 300 to  
73 600 bp (Hails et al., 1995; Petracek et al., 1990); (iii) they form G-quadruplex structures *in*  
74 *vitro* (Petracek and Berman, 1992), and (iv) the Gbp1 protein potentially binds to telomeres  
75 (Johnston et al., 1999; Petracek et al., 1994). More recently, bioinformatic studies focused on  
76 the evolutionary relationships of telomere sequences in green algae (Fulneckova et al., 2012;  
77 Fulneckova et al., 2015). Finally, a broad study of telomerase activity in green algae revealed  
78 that telomerase activity in *C. reinhardtii* extracts is low or not detectable (Fulneckova et al.,  
79 2013).

*Chlamydomonas telomeres and telomerase mutants*

80 To gain a better understanding of *C. reinhardtii* telomere structure and maintenance,  
81 we investigated telomere sequence and end structure, analyzed telomere length distribution  
82 across different reference strains, identified *CrTERT*, the gene encoding the catalytic subunit  
83 of telomerase, and provided a genetic analysis of telomerase function, thus opening new  
84 avenues of research on telomere dynamics, proliferation potential and genome integrity in *C.*  
85 *reinhardtii*.

86

## 87 RESULTS

88

### 89 *C. reinhardtii* telomeric repeats are mostly non-degenerate with few low-frequency 90 variants

91 In their seminal paper, Petracek *et al.* cloned and sequenced a limited number of *C.*  
92 *reinhardtii* telomeric repeats, revealing their canonical TTTTAGGG sequence (Petracek *et*  
93 *al.*, 1990). Telomeric repeats are also identifiable in 18 out of 34 chromosome ends on the  
94 available v5.5 genome sequence of *C. reinhardtii* (<https://phytozome.jgi.doe.gov>;  
95 **Supplemental Figure S1A**). As the sequenced genome shows some telomeric repeat  
96 variations, we analyzed telomeric repeat sequences on a larger scale and looked for putative  
97 variants of the canonical telomere sequence. We amplified telomeres by a PCR-based method  
98 (Forstemann *et al.*, 2000) using a forward primer specific to a conserved subtelomere-  
99 telomere junction common to 10 telomeres from 8 different chromosomes (**Supplemental**  
100 **Figure S1A and S1B**). The reverse primer was universal and annealed to a sequence of  
101 cytosines, artificially added at the 3'-end of the telomeres by terminal transferase reaction.  
102 After cloning into a plasmid and sequencing, we analyzed 32 telomere sequences,  
103 encompassing 709 repeats. We found that ~90% (n = 636) of the repeats corresponded to the  
104 canonical sequence TTTTAGGG. We also detected variants such as TTTAGGG  
105 (corresponding to the canonical *A. thaliana* sequence, n = 37, either at the subtelomere-  
106 telomere junction, n = 24, or elsewhere, n = 13) or TTTTLAGGG (n = 13) and TTTTGGG (n  
107 = 8) (**Table 1** and **Supplemental Figure S1B**). These three variants were found in at least  
108 two independent clones at the same position in the telomere sequence, thus likely representing  
109 true low-frequency variants and not sequencing errors. We also detected sequence variants  
110 that occurred only in single clones (n = 15) and for which PCR and/or sequencing errors can  
111 therefore not be ruled out. We conclude that *C. reinhardtii* telomeric repeats are mostly non-  
112 degenerate with few low-frequency variants.

113

114 ***C. reinhardtii* telomeres form a non-nucleosomal protective structure, bear a 3' overhang**  
115 **and show no evidence for blunt ends**

116 The protective structure formed by telomeric DNA bound by specific proteins is  
117 critical for telomere functions (Palm and de Lange, 2008). To test the presence of such a  
118 structure at *C. reinhardtii* telomeres, we performed a micrococcal nuclease (MNase) digestion  
119 of nuclei and asked whether telomere DNA would be protected from its activity. When nuclei  
120 were subjected to increasing amounts of MNase, nucleosomal DNA was protected from  
121 digestion and migrated at ~150 bp based on ethidium bromide staining (**Figure 1A**, left), as  
122 expected (Clark, 2010). Intermediate digestion products migrated in a typical ladder pattern  
123 corresponding to di-nucleosomes, tri-nucleosomes and higher order structures. Strikingly,  
124 Southern blotting with a radioactive telomeric probe revealed that telomeric DNA was  
125 protected from MNase digestion in a non-nucleosomal pattern (**Figure 1A** right). As a  
126 control, the same membrane was stripped and probed for 18S rDNA, revealing the canonical  
127 nucleosome structure (**Figure 1A**, middle). The size of the protected telomeric DNA was in  
128 the range of 200-700 bp, which could correspond to the full telomere length. This result  
129 suggests that telomeric DNA might be fully associated with and protected by protein  
130 complexes in a non-nucleosomal structure, similar to telosomes as observed in yeast for  
131 example (Wright et al., 1992).

132 The chromosome end-structure determines the protection strategies employed to cap  
133 the telomere. In many species, telomeres end with a 5' to 3' single-stranded overhang,  
134 important for the protective t-loop structure in human telomeres, telomerase recruitment and  
135 binding of specific proteins, such as the CST and Ku complexes (Giraud-Panis et al., 2010;  
136 Palm and de Lange, 2008; Wellinger and Zakian, 2012). As it was reported that the Gbp1  
137 protein preferentially binds single-stranded *C. reinhardtii* telomeric DNA (Johnston et al.,  
138 1999), the presence of a 3' overhang would be consistent with a role of Gbp1 at telomeres. In  
139 order to experimentally test the presence of a 3' overhang at *C. reinhardtii* telomeres, we  
140 performed Primer Extension Telomere Repeat Amplification (PETRA) (Heacock et al.,  
141 2004)). PETRA requires the annealing of an adaptor primer (PETRA-T) to the overhang.  
142 After primer extension, the telomere was PCR-amplified using a unique subtelomeric forward  
143 primer and a reverse primer (PETRA-A) complementary to a tag sequence present in PETRA-  
144 T (**Supplemental Figure S1C**). Successful amplification by PETRA is indicative of the  
145 presence of a 3' overhang. Using primers specific for three different telomeres (1R, 9R and  
146 10R), we found robust amplification of PETRA products in two *C. reinhardtii* strains (T222+  
147 and CC125+), strongly suggesting that these telomeres have a 3' overhang of at least 12

*Chlamydomonas telomeres and telomerase mutants*

148 nucleotides, corresponding to the size of the annealed part of PETRA-T to the overhang  
149 (**Figure 1B** and **Supplemental Figure S1C**). The size of PETRA products (between 800 and  
150 1000 bp) allowed us to evaluate the average length of the 1R, 9R and 10R telomeres by  
151 subtracting the distance between the forward primer and the beginning of the telomeric  
152 repeats, resulting in telomere lengths of ~700 bp for 1R, ~400 bp for 9R and ~550 bp for 10R  
153 in these clones.

154 As it was shown that a subset of *A. thaliana* telomeres display blunt ends instead of 3'  
155 overhangs (Kazda et al., 2012), we asked whether blunt-ended telomeres also exist in *C.*  
156 *reinhardtii*, since the PETRA experiment alone cannot exclude this possibility. To test this,  
157 we applied a hairpin assay, which was successfully used in *A. thaliana* to detect blunt-ended  
158 telomeres (Kazda et al., 2012). Briefly, a synthetic hairpin DNA can be ligated to both strands  
159 of the telomeres, only if they are blunt-ended. After digestion with *AluI* at a site in the  
160 subtelomeres, the ligated products migrate as a double-sized fragment compared to the  
161 unligated control in denaturing conditions. Cleavage of the ligated product by *BamHI*, using a  
162 restriction site designed in the hairpin, can then show that the slow migrating product was  
163 indeed generated by ligation to the hairpin (**Supplemental Figure S1D**, left). No blunt ends  
164 could be detected using this hairpin assay in two independent biological replicates for strains  
165 T222+, CC125+ (**Supplemental Figure 1D**, right), and for four additional strains CC620,  
166 CC621, 21gr and 302 (**Supplemental Figure S1E**).

167 Taken together, the results suggest that most *C. reinhardtii* telomeres end with a 3'  
168 overhang.

169  
170 **Analysis of *C. reinhardtii* telomeres by Terminal Restriction Fragment (TRF) Southern**  
171 **blots**

172 To study telomere length distributions and their possible regulations, we optimized a  
173 TRF Southern blot method for *C. reinhardtii* to accurately measure telomere length from  
174 populations of cells. Briefly, a cocktail of six restriction enzymes that do not cut in the  
175 canonical and variant telomere motifs of *C. reinhardtii* was selected and predicted to cut ~100  
176 bp from the telomeres, on average. Southern blot analysis of genomic DNA treated by the  
177 enzyme cocktail, using a radioactive oligo-probe containing TTTTAGGG telomere repeats  
178 allowed for specific detection of telomere-containing fragments (Fulneckova et al., 2013).

179 We first measured telomere length in three independent biological replicates of strains  
180 T222+ and S24-, two isogenic reference strains differing only in their mating-type (Gallaher  
181 et al., 2015). We found that telomere fragments spread as a smear over a large range of

182 lengths, from ~200 to ~1200 bp (**Figure 1C**). The two strains displayed a significant  
183 difference in their average telomere length (mean  $\pm$  SD: T222+ = 539  $\pm$  54 bp, N = 18, and  
184 S24- = 710  $\pm$  12 bp, N = 5). To demonstrate that the detected smeary signal indeed  
185 corresponded to terminal fragments of the chromosomes, we digested the genomic DNA with  
186 exonuclease *Bal31* prior to the digestion with the cocktail of restriction enzymes and Southern  
187 blotting (Fajkus et al., 2005; Petracek et al., 1990; Richards and Ausubel, 1988). Briefly,  
188 *Bal31* degrades both 3' and 5' termini of duplexed DNA and thus trims the chromosome  
189 extremities without affecting internal regions. We observed that with increasing incubation  
190 times with *Bal31*, the signal progressively decreased in size until it nearly disappeared after  
191 10 min (**Figure 1D** and **Supplemental Figure S1F**), demonstrating that it indeed  
192 corresponded to terminal telomere sequences. A band at ~200 bp remained unchanged even  
193 with the longest *Bal31* treatment, indicating that it stemmed from interstitial telomere repeats  
194 located within the genome. Since this sharp band did not cross-react with a probe targeting  
195 TG microsatellite sequences (**Supplemental Figure S1G**), it most probably corresponded to  
196 *bona fide* telomere-sequence-containing region(s) of the genome and not to non-specific  
197 cross-hybridizations.

198

### 199 **Telomeres length distribution is stable in different standard growth conditions**

200 *C. reinhardtii* has been widely used as a model organism to study photosynthetic  
201 processes due to its ability to grow in different metabolic regimes (Harris, 2009). Under  
202 strictly phototrophic conditions (minimum medium in the light), photosynthesis is the only  
203 metabolic process providing ATP and reducing power to growing cells. In strictly  
204 heterotrophic conditions in the dark, *C. reinhardtii* can survive by respiring the acetate  
205 contained in Tris-Acetate Phosphate (TAP) medium. In mixotrophic conditions, *i.e.* TAP  
206 medium in the light, cells use a combination of photosynthesis and respiration to grow. Since  
207 in other organisms, environmental conditions can regulate telomere length (Epel et al., 2004;  
208 Romano et al., 2013; von Zglinicki, 2000; Walmsley and Petes, 1985), we asked whether  
209 telomeres vary in length and/or size distributions in response to different standard growth  
210 conditions.

211 We first tested whether cells displayed different telomere lengths during a standard  
212 growth kinetic in TAP medium, from inoculation to exponential and then stationary phase,  
213 sampled at different time points over a period of 8 days. We observed no significant  
214 difference in telomere length between the samples (**Figure 2A**). Prolonged incubation in  
215 stationary phase for up to 15 days also did not strongly affect telomere length, despite a slight



*Chlamydomonas telomeres and telomerase mutants*

216 drop at day 8 (**Figure 2B**). Thus, telomere length were not altered either in exponential  
217 growth in replete medium or in the absence of growth, during nutrient depletion and with any  
218 other properties of saturated cultures, even over a prolonged period.

219 We also asked whether stimulating cell growth could affect telomere length. Because  
220 of the multiple fission mode of cell division of *C. reinhardtii* (Cross and Umen, 2015),  
221 actively growing cells might spend less time in each cell cycle and we reasoned that on  
222 average telomerase might thus be less active. To test this hypothesis, a TAP culture was  
223 constantly maintained in exponential growth phase by serial dilutions over a period of 10  
224 days. Telomere length did not significantly change (**Figure 2C**) and therefore, high division  
225 rate did not affect telomere length or distribution.

226 Finally, we checked telomere length distributions in cultures grown in either strictly  
227 phototrophic, strictly heterotrophic, or mixotrophic conditions for 7 days in liquid medium  
228 (~20 population doublings) but found no significant difference between the conditions  
229 (**Figure 2D**). As telomeres might reach a new steady-state level with a slower kinetic, we  
230 repeated the experiment over a period of 60 days (~200 population doublings) but again did  
231 not detect changes in telomere length regardless of the growth conditions (**Supplemental**  
232 **Figure S2**).

233 These experiments demonstrated that *C. reinhardtii* has an active telomere  
234 maintenance mechanism and that telomere length distribution is robust with regards to  
235 perturbation in metabolic regimes under a variety of standard laboratory growth conditions.

236

237 ***C. reinhardtii* reference strains show dramatic differences in telomere length and size**  
238 **distributions**

239 Even though telomere length distribution was very stable under different growth  
240 conditions for a given strain (**Figure 2**), we did observe a reproducible and significant  
241 difference in mean telomere length between the two laboratory reference strains T222+ and  
242 CC125+ by PETRA (**Figure 1B** and **Supplemental Figure S1C**) and between T222+ and  
243 S24- by TRF Southern blot (**Figure 1C**). We thus wondered if closely related but divergent *C.*  
244 *reinhardtii* strains displayed significant inter-strain differences in telomere length  
245 distributions. To test this, we took advantage of the recent sequencing of many closely related  
246 reference strains widely used in different laboratories across the world and which display up  
247 to 2% genetic divergence (Gallaher et al., 2015). We performed TRF Southern blots on 12  
248 related but divergent *C. reinhardtii* strains to characterize their telomeres (**Figure 3A**).  
249 Strikingly, steady-state telomere lengths were highly variable from strain to strain, ranging



250 from  $378 \pm 24$  bp (mean  $\pm$  SD, N = 4) in CC125+ to  $3.2 \pm 1.1$  kb (N = 3) in cw15.J14+,  
251 encompassing nearly one order of magnitude (**Figure 3B**). Telomere length did not correlate  
252 with genome divergence (genetically close strains are depicted with the same color) and we  
253 did not find any obvious genomic region, as described in Gallaher *et al.* (2015), that would  
254 co-segregate with longer or shorter telomeres. In particular, neither the mating type, nor the  
255 presence or absence of a cell wall correlated with telomere length variations. The average  
256 telomere length in strain cw15.J14+ was particularly striking and we asked whether the signal  
257 corresponded to internal telomere repeats. A *Bal31* exonuclease treatment time course prior to  
258 TRF Southern blotting showed the signal decreasing in size demonstrating that this signal  
259 indeed corresponded to terminal repeats (**Supplemental Figure S3B**, right). In addition to  
260 length variations, some strains, such as CC503+ and CC1010+, displayed multimodal  
261 telomere length distributions (**Figure 3A, 3B** and **Supplemental Figure S3A**), some peaks of  
262 which might correspond to internal telomere repeats. To test this possibility, we performed a  
263 *Bal31* treatment experiment on strain CC503+, prior to TRF analysis. The whole smear,  
264 including the three peaks of the multimodal distribution, was progressively degraded with  
265 increasing digestion time, demonstrating that the multimodal distribution corresponded to  
266 terminal telomere repeats of different lengths (**Supplemental Figure S3B**, left).

267 Interestingly, the interstitial band at  $\sim 200$  bp, which was present in 11 tested  
268 *C. reinhardtii* reference strains was absent from the S1D2- (CC2290-) strain. S1D2- is an  
269 interfertile but divergent *C. reinhardtii* species, often used for genetic mapping purposes  
270 (Gross *et al.*, 1988; Vysotskaia *et al.*, 2001). Thus, the interstitial telomere sequence might  
271 have emerged in a subset of *C. reinhardtii* species or conversely might have been lost in  
272 S1D2-.

273

## 274 **Identification of the gene encoding the catalytic subunit of telomerase**

275 Telomerase is a holoenzyme comprised of at least a reverse-transcriptase catalytic  
276 subunit and a template RNA, which are sufficient for *in vitro* telomerase activity (Lingner *et al.*,  
277 1997a). These core actors are associated with multiple other proteins, required for its  
278 recruitment, processivity and regulation (Lewis and Wuttke, 2012). As the catalytic subunit of  
279 telomerase (*e.g.* hTERT in human, AtTERT in *A. thaliana* and Est2 in *S. cerevisiae*) is  
280 conserved, we sought to identify the gene encoding this subunit in *C. reinhardtii* and to  
281 characterize the contribution of telomerase to telomere length maintenance.

282 Gene model Cre04.g213652 of the *C. reinhardtii* nuclear genome (Phytozome v5.5;  
283 <https://phytozome.jgi.doe.gov/pz/#>) has a predicted N-terminal part of the corresponding

*Chlamydomonas telomeres and telomerase mutants*

284 protein showing partial sequence similarity with RNA-binding domains of telomerase from a  
285 number of organisms (**Figure 4A**). The available gene model extends over 25 kb, contains 28  
286 introns and is predicted to encode a 5019-aa protein, much larger than telomerases from *A.*  
287 *thaliana* (1123 aa), maize (1188 aa), iris (1295 aa) and rice (1261 aa). Two sequencing gaps  
288 and the presence of TG and CCAC satellites in the gene model (both in introns and in exons)  
289 cloud the structure of the putative gene. While expressed sequence tags from cDNA libraries  
290 supported the validity of some parts of the conserved 5' and 3' regions, no expressed sequence  
291 tag was found for the central part of the gene model in the available *C. reinhardtii* expression  
292 libraries. Nucleotide sequence alignments failed to detect similarity with telomerase catalytic  
293 subunit genes of other organisms. We thus performed PSI-Blast alignments of the C-terminal  
294 protein domain of the putative *C. reinhardtii* telomerase with telomerases from plants using  
295 PRALINE (<http://www.ibi.vu.nl/programs/pralinewww>). The alignments showed strong  
296 similarity to the C-terminal catalytic reverse transcriptase domain of *A. thaliana* (e-value =  
297  $3.10^{-36}$ ), maize (e-value =  $4.10^{-35}$ ), iris (e-value =  $1.10^{-36}$ ) and rice (e-value =  $3.10^{-24}$ ) (**Figure**  
298 **4B**). The conserved C motif (mC) in telomerases ranging from *S. cerevisiae* to *A. thaliana* and  
299 humans including the two critical aspartates for telomerase catalytic activity (Lingner et al.,  
300 1997b; Nakamura et al., 1997; Oguchi et al., 1999) showed strong sequence conservation with  
301 a corresponding motif in the putative *C. reinhardtii* protein (**Figure 4B** and **4C**). Motif E  
302 (mE) was conserved to a lesser degree, while no clear conservation of motifs mA, mD, motif  
303 1 and 2 (Lingner et al., 1997b; Oguchi et al., 1999) was found in the predicted *C. reinhardtii*  
304 protein. Other well conserved regions in the C-terminal part with no assigned motif are also  
305 depicted in **Figure 4B**.

306 To demonstrate that the genomic region Cre04.g213652 indeed contains the gene  
307 encoding the catalytic subunit of telomerase of *C. reinhardtii*, we used a genetic approach.  
308 We selected three strains harboring insertions of the paromomycin resistance cassette within  
309 the putative gene from the recently created CliP library of mapped insertional mutants (Li et  
310 al., 2016) (<https://www.chlamylibrary.org>) (**Figure 4A**). LMJ.RY0402.077111 has an  
311 insertion in a putative intron near the region encoding the putative RNA-binding domain of  
312 the gene and was named tel-m1. LMJ.RY0402.209904 has an insertion in the putative CDS of  
313 the putative catalytic C-terminal domain and was named tel-m2. LMJ.RY0402.105594 has an  
314 insertion in an intron in a non-conserved region between these two domains and was named  
315 tel-m4. Although the insertions in these three mutants were already mapped by the work of Li  
316 *et al.* (2016) with a confidence of 95% for tel-m1 and tel-m4 and 73% for tel-m2, we verified  
317 that all three mutants indeed had the insertion at the predicted loci, using PCR with primers

318 targeting the gene and/or the inserted paromomycin resistance marker (**Supplemental Figure**  
319 **S4A and S4B**). For all three mutants, the obtained PCR products were gel-excised, sequenced  
320 and shown to correspond to the expected genomic region. We also backcrossed mutants tel-  
321 m1 and tel-m2 with the paromomycin-sensitive T222+ strain and analyzed the segregation of  
322 the paromomycin resistance phenotype in tetrads after sporulation of the diploids. Correct 2:2  
323 segregation of the mating locus in the offspring of the tetrads was checked by PCR  
324 (**Supplemental Figure S4D**). Paromomycin resistance systematically segregated with a 2:2  
325 ratio in the haploid offspring, suggesting that the functional marker was not inserted at  
326 multiple loci in the genome (**Supplemental Figure S4C**).

327 We then analyzed the telomere length of the three mutant strains. All three mutants  
328 showed significantly shorter telomeres when compared to the parental CC4533- strain used by  
329 Li *et al.* (2016) to construct the CliP library (**Figure 5A** and **Supplemental Figure S5A**;  
330 mean  $\pm$  SD, tel-m1:  $373 \pm 25$  bp, N = 4, tel-m2:  $383 \pm 30$  bp, N = 4, and tel-m4:  $387 \pm 12$  bp,  
331 N = 2, compared to CC4533-:  $614 \pm 41$  bp, N = 3). We verified that the shorter telomere  
332 length in mutants tel-m1, tel-m2 and tel-m4 was not simply due to the transformation protocol  
333 used to generate the CliP library or to the insertion of the paromomycin marker itself.  
334 Telomere length was measured in another mutant from the CliP library, harboring an insertion  
335 elsewhere in the genome (on chromosome 1), and was comparable to the parental CC4533-  
336 strain (**Figure 5A**, "control" and **Supplemental Figure S5D**).

337 We conclude that while gene model Cre04.g213652 might be wrong in its predicted  
338 structure and will require further study to be corrected, this genomic region indeed harbors the  
339 gene encoding for the catalytic subunit of telomerase in *C. reinhardtii*, and we propose to  
340 rename the gene model *CrTERT*.

341

### 342 **Telomere rearrangement and maintenance in long-term cultures of telomerase mutants**

343 Since telomeres shortened in telomerase-negative cells, we wondered whether the cells  
344 would experience replicative senescence after an extended period of growth, when telomeres  
345 reach a critically short length. We thus grew the telomerase mutants tel-m1 and tel-m2 as well  
346 as the reference strain for two months (~200 population doublings), with dilutions into fresh  
347 TAP medium every 5 days. While we did not observe *CrTERT* mutant cultures dying out and  
348 no obvious growth defect was detected at any time point, TRF analysis of the telomere length  
349 distribution of tel-m1, tel-m2 showed a drastic change in telomere length distribution (**Figure**  
350 **5B**, compare with **Figure 5A**): first, the bulk of the telomeres seemed to have a short average  
351 length but longer than initially (~500 bp, compared to mean  $\pm$  SD =  $383 \pm 30$  bp); secondly,

*Chlamydomonas telomeres and telomerase mutants*

352 additional discreet bands appeared at sizes above 1 kb (red dots); finally, a signal that  
353 extended up to the wells was detected (vertical red line). Interestingly, the three independent  
354 cultures of the tel-m2 mutant gave similar but distinct patterns with respect to the discreet  
355 bands and the high molecular weight signal. The tel-m1 mutant also showed on average  
356 longer telomeres after an extended period of culture than initially (**Figure 5B**, compare with  
357 **Figure 5A**) and displayed some additional bands, albeit not to the extent of tel-m2. Overall,  
358 these altered TRF patterns observed in prolonged cultures of telomerase mutants are  
359 reminiscent of TRF patterns observed for cells with telomerase-independent maintenance  
360 pathways (*e.g.* type II survivors of telomerase-negative yeast cells or ALT-like telomerase-  
361 negative cancer cells. See discussion.)

362

363 **Telomeres shorten progressively in telomerase mutants**

364 The initial CliP telomerase mutants might have accumulated additional, potentially  
365 suppressor, mutations, which could interfere with the proper assessment of the mutant  
366 phenotype. Importantly, the presence of suppressive mutations could explain why these  
367 mutants did not show any discernable growth defects in standard growth conditions or any  
368 sign of senescence after prolonged culture.

369 To outcross potential suppressor mutations and gain a kinetic perspective on telomere  
370 shortening in the telomerase mutants, we backcrossed mutants tel-m1 and tel-m2 with a wild-  
371 type strain of opposite mating type (T222+) and, after sporulation of the diploids, studied the  
372 telomere length distribution of the obtained tetrads. Backcrossing a mutant cell with a  
373 telomerase-positive strain should allow telomerase to elongate the shortest telomeres brought  
374 in by the mutant strain. The subsequent meiosis would then shuffle the chromosomes and the  
375 telomeres in the spores, independently of the mutant or wild-type status of the telomerase  
376 gene. We thus expect that immediately after sporulation of the diploid, the four spores would  
377 have similar and nearly wild-type average telomere length. After culture, the telomere length  
378 in the four progenies should vary according to the status of the *CrTERT* gene.

379 Strikingly, measurement of telomere length in the four haploid progenies of the tel-  
380 m1- x T222+ cross after 21 days showed that two of them displayed longer average telomere  
381 length and the other two shorter telomeres, which corresponded to the telomerase mutants as  
382 assessed by paromomycin resistance (**Figure 5C**, "21 days"). After 21 more days, the  
383 telomeres of the telomerase-positive cultures maintained their average length, whereas the  
384 telomerase-negative cultures displayed further shortening of their telomeres (**Figure 5C**, "42  
385 days", and **Supplemental Figure S5B**). Therefore, mutation of the *CrTERT* gene led to an

386 “Ever Shorter Telomere” (EST) phenotype as first described in *S. cerevisiae* (Lundblad and  
387 Szostak, 1989). A similar result was observed for the progenies of the cross tel-m2- x T222+  
388 (**Figure 5D** and **Supplemental Figure S5C**). These results strongly argued against the  
389 possibility that the shorter telomeres observed in tel-m1 and tel-m2 were due to additional  
390 mutations in the genome, because they would not necessarily have co-segregated with the  
391 paromomycin marker. We also noted the presence of other bands and peaks in the smear,  
392 which were likely the result of segregating parental telomeres of very different lengths during  
393 meiosis (black dots in **Figure 5C**, **5D** and **Supplemental Figure S5B**).

394 While no growth defects were observed for the initial tel-m1 and tel-m2 mutants,  
395 analysis of the progeny of the spores from backcrosses between tel-m1 and tel-m2 with the  
396 wild-type T222+ strain (n = 4 independent tetrads, with 8 telomerase-negative spores) showed  
397 that 4 out of the 8 telomerase-negative haploid progenies experienced growth defects and then  
398 massive cell death, typical of replicative senescence (highlighted in red in the table of  
399 **Supplemental Figure S5E**). Strikingly, for each of these 4 telomerase-negative progenies  
400 that experienced massive cell death, some cells managed to form colonies again at very low  
401 frequency (**Supplemental Figure S5E**, left) and thus corresponded to post-senescence  
402 survivors. The 4 other telomerase-negative haploid progenies did not display any growth  
403 defect (highlighted in green in the table of **Supplemental Figure S5E**). Individual colonies of  
404 post-senescent survivors kept on solid media showed cycles of moderate growth and  
405 subsequent cell death. This complex and dynamic survivor phenotype will be investigated in  
406 future studies.

407

## 408 **DISCUSSION**

409 In this study, we provide a detailed molecular characterization of *C. reinhardtii*  
410 telomeres by investigating their sequence, end-structure and length distribution. We also  
411 identify *CrTERT*, the gene encoding the catalytic subunit of telomerase, and find that mutants  
412 of this gene display an “Ever Shortening Telomere” phenotype and can enter replicative  
413 senescence.

414

### 415 **Telomere repeats and variants**

416 A precise knowledge of the sequence architecture of telomeric repeats in *C.*  
417 *reinhardtii* is important information for the understanding of the molecular mechanisms  
418 underlying their physiological roles (*e.g.* shortening, lengthening, gene expression regulation  
419 and binding of regulatory proteins). Some species such as *S. cerevisiae* and *S. pombe* display

*Chlamydomonas telomeres and telomerase mutants*

420 degenerated telomere sequences, while other organisms harbor mostly identical repeats  
421 (Zakian, 1995). Because telomere-bound proteins specifically interact with telomere  
422 sequences (Fulcher et al., 2014; Palm and de Lange, 2008), the variability of telomeric repeat  
423 motif can have functional consequences. For example, the presence of sequence variants can  
424 create binding sites for other proteins: in *S. cerevisiae*, the presence of the human type  
425 TTAGGG motif close to the (TG<sub>1-3</sub>)<sub>n</sub> telomeres creates binding sites for the essential Tbf1  
426 transcription factor, which contributes to telomerase recruitment and may provide an  
427 alternative capping (Arneric and Lingner, 2007); and in human cancer cells with alternative  
428 telomere maintenance mechanism, variant telomere sequences are bound and inserted in the  
429 genome by nuclear receptors, which destabilizes the genome (Marzec et al., 2015).

430 By analyzing 32 independent clones and 709 telomeric repeats, we come to the  
431 conclusion that *C. reinhardtii* telomeric repeats are mostly non-degenerated, with few low-  
432 frequency variants, notably repeats of the canonical *A. thaliana* type (TTTAGGG). This  
433 repeat is also found as the first repeat in 10 subtelomere-telomere junctions from eight  
434 chromosomes (**Table 1** and **Supplemental Figure S1A**), possibly a remnant of the ancestral  
435 motif in the green lineage (Fulneckova et al., 2012). The low occurrence of other variants  
436 (**Table 1**) suggests that *C. reinhardtii* telomerase is a high fidelity reverse transcriptase, in  
437 contrast to telomerase from other unicellular eukaryotes such as *S. pombe* or *S. cerevisiae*.

438 Analysis of the available genome sequences of *C. reinhardtii* strains shows some  
439 occurrences of interstitial telomeric repeats and our TRF Southern blot experiments showed a  
440 non-terminal fragment of ~200 bp, the length of which is defined by its resistance to digestion  
441 with the cocktail of restriction enzymes we used (**Figure 1D** and **Supplemental Figures S1F**  
442 **and S3B**, denoted by a star). The presence of the interstitial telomeric repeats might be due to  
443 chromosome end-to-end fusion over the course of evolution (Aksenova et al., 2015; Azzalin  
444 et al., 2001; Gaspin et al., 2010; Meyne et al., 1990; Uchida et al., 2002). Furthermore, as  
445 telomere sequences are binding sites for specific proteins, which may act as transcription  
446 factors (*e.g.* Rap1 in yeast), they can act as transcriptional regulators of intragenomic loci  
447 (Platt et al., 2013).

448

449 **Intra-strain stability and dramatic inter-strain variations in telomere length**  
450 **distributions**

451 Telomere length is regulated by multiple pathways, as shown by exhaustive screens  
452 performed in *S. cerevisiae* (Askree et al., 2004; Chang et al., 2011; Gatbonton et al., 2006;  
453 Ungar et al., 2009). These pathways are very diverse and include nucleic acid metabolism,



454 DNA replication, chromatin modification and protein degradation, among others. In addition,  
455 telomere length is also sensitive to both internal and environmental cues (Cetin and  
456 Cleveland, 2010; Epel et al., 2004; Fulcher et al., 2014; Millet et al., 2015; Millet and  
457 Makovets, 2016; Romano et al., 2013; von Zglinicki, 2000; Walmsley and Petes, 1985). We  
458 found no change in telomere length distribution when *C. reinhardtii* cells were grown in a  
459 wide variety of standard laboratory conditions, including growth phases (exponential vs  
460 stationary), carbon source and light conditions, which are all relevant for physiological  
461 growth of this alga. While we cannot exclude that other harsher growth conditions or internal  
462 signaling (e.g. DNA damage or replication stress) might induce an alteration in telomere  
463 length or structure, this result suggests that the mechanisms maintaining telomere length  
464 homeostasis are highly robust and efficient.

465 In stark contrast, closely related strains of *C. reinhardtii* displayed very different  
466 telomere length profiles, suggesting that steady-state telomere length is not under selective  
467 pressure. In particular, strains with very short (e.g. CC125+) or very long (e.g. cw15.J14+)  
468 telomeres (**Figure 3**) might differ in their telomerase activity or in other regulators of  
469 telomere homeostasis. However, no obvious genome region could be correlated to this length  
470 variation. A more detailed functional genetic approach to map the regions of the genome  
471 responsible for telomere length variation could identify pathways regulating telomere length.

472 Beside length variation, some strains such as CC503+ and cw15.J14+ displayed  
473 multimodal profiles (**Figure 3**). Such profiles could be explained by a heterogeneous cell  
474 population with a subpopulation of cells harboring very different average telomere lengths.  
475 Given that all our experiments were performed after subcloning, the phenotypic heterogeneity  
476 could have arisen in a genetically uniform population of cells and been maintained as an  
477 epigenetic trait. Another hypothesis would be that different telomeres within a cell might have  
478 different steady-state lengths, possibly through local cis-regulation mechanisms.

479 Overall, the diversity of telomere length distributions observed in these reference  
480 strains highlights the plasticity of telomere length regulation and the phenotypic heterogeneity  
481 of *C. reinhardtii* reference strains.

482

### 483 **Identification of *CrTERT* encoding the catalytic subunit of telomerase**

484 Based on sequence similarity (**Figure 4**) and functional analyses of three independent  
485 mutant alleles of the gene Cre04.g213652 (**Figure 5** and **Supplemental Figure S5**), we  
486 propose that it corresponds to, or at least encompasses, the gene encoding the catalytic subunit



*Chlamydomonas telomeres and telomerase mutants*

487 of telomerase, required to maintain telomere length in *C. reinhardtii*. We propose to rename it  
488 *CrTERT*.

489 Multiple lines of evidence support this conclusion. First, the predicted protein shares  
490 significant sequence similarity with the RNA-binding domain of telomerase from other  
491 organisms in its N-terminus. Secondly, we find a very strong conservation of the C-terminal  
492 domain of the proposed CrTERT protein with catalytic domains of telomerases not only from  
493 plants (Maize, Arabidopsis, Soya, Iris; **Figure 4B**) but also from yeast and human (**Figure**  
494 **4C**). Motif C (mC) is particularly well conserved, including two aspartates essential for the  
495 catalytic activity of telomerase (**Figure 4B** and **4C**). Thirdly, three independent mutants (tel-  
496 m1, tel-m2 and tel-m4) bearing different insertions of the paromomycin resistance marker in  
497 *CrTERT*, including within its RNA-binding domain (tel-m1) and its catalytic domain (tel-m2)  
498 display significantly shorter telomeres than the parental CC4533- strain, which is not the case  
499 for other independent mutants from the CliP library located in loci unrelated to telomerase  
500 (**Figure 5A, Supplemental Figure S5D**). Backcrosses of tel-m1 and tel-m2 showed a 2:2  
501 segregation of paromomycin resistance associated with shorter telomere lengths (**Figure 5C**  
502 and **5D; Supplemental Figure S5B** and **S5C**), indicating that a single insertion of the  
503 paromomycin marker in *CrTERT* was responsible for the observed phenotype. Finally,  
504 telomeres shortened progressively in paromomycin-resistant progenies. However, as we are as  
505 of yet unable to detect the mRNA corresponding to *CrTERT* by either northern blotting or  
506 RT-qPCR, possibly because of its low expression, we could not assess *CrTERT* expression in  
507 our study.

508 The identification of additional components of the telomerase holoenzyme and  
509 telomere associated proteins will be the focus of future work.

510

511 **Telomere shortening, replicative senescence and alternative maintenance pathways**

512 After prolonged liquid cultures of multiple independent tel-m1 and tel-m2 mutants, we  
513 observed a drastically altered TRF pattern: discrete bands above the 1.5 kb range (**Figure 5B**  
514 red dots) as well as a continuous smear of high molecular weight fragments up to the wells  
515 (**Figure 5B**, vertical red line). These new TRF signals could correspond to extremely long  
516 telomeres, as seen for strain cw15.J14+, but also to DNA molecules with abnormal structures,  
517 such as G-quartets, other secondary structures or single-stranded DNA. These rearrangements  
518 suggest that alternative mechanisms of telomere maintenance or elongation might have been  
519 activated or selected. Overall, the altered telomere length distribution in long-term cultures of  
520 *CrTERT* mutants is reminiscent of telomere profiles observed in type II post-senescent yeast

521 cells (Lundblad and Blackburn, 1993), ALT (Alternative Lengthening of Telomeres) cancer  
522 cells (Cesare and Reddel, 2010; Shay et al., 2012) or ALT *A. thaliana* cell lines (Akimcheva  
523 et al., 2008; Zellinger et al., 2007), in which telomerase-independent recombination  
524 mechanisms can lead to very long and heterogeneous telomeres, thus sustaining long-term  
525 cell divisions. In these described cases, telomerase is not expressed, telomeres undergo sister-  
526 chromatid and inter-chromosome homologous recombination using gene conversion, break-  
527 induced replication, rolling circle amplification or yet unknown mechanisms. This  
528 telomerase-independent telomere elongation leads to a change of telomere and subtelomere  
529 structures, revealed by distinct TRF patterns, resembling the ones we observe after extended  
530 culture of the tel-m1 and tel-m2 mutants.

531 Another line of evidence suggesting the occurrence of post-senescence survivors of  
532 telomerase-negative cells in *C. reinhardtii* came from the analysis of the offspring of  
533 backcrosses of the tel-m1 and tel-m2 mutants with T222+ reference strain. The *CrTERT*  
534 mutant spore progenies displayed an “Ever Shortening Telomere” phenotype (**Figure 5C** and  
535 **5D; Supplemental Figure S5B** and **S5C**) and 50% of them eventually stopped growing after  
536 about 6 months on solid media, a phenotype consistent with replicative senescence  
537 (**Supplemental Figure S5E**). The other 50% of telomerase-negative spores has not entered  
538 senescence as of yet (> 18 months). The spores that experienced senescence and generated  
539 first generation survivors then showed a complex pattern of moderate growth, followed by  
540 cell death and emergence of a new generation of clonal survivors. We do not yet understand  
541 the variability of the senescence phenotype in these backcrossed haploid progenies. We  
542 speculate that for the initial CliP mutants, additional mutations could have been generated that  
543 might have acted as suppressors of the senescence phenotype. This would also explain why  
544 no growth defects were observed for the initial CliP mutants even after more than two years  
545 of maintenance on solid media, while senescence, cell death and post-senescent survivors  
546 could be observed after backcrossing these mutants and selecting telomerase-negative spore  
547 progenies. Alternatively, the initial CliP mutants might have already been post-senescence  
548 survivors from the beginning. In a future work, it will be interesting to characterize post-  
549 senescence survivors by assessing hallmarks of human ALT cancers, including for example  
550 circular extrachromosomal telomeric DNA and up regulation of telomeric repeat-containing  
551 RNA (TERRA) (Arora and Azzalin, 2015; Cesare and Reddel, 2010).

552  
553 While some fundamental aspects of its telomeres share similarities to other eukaryotes,  
554 *C. reinhardtii* shows a unique combination of telomeric properties that distinguishes it from

*Chlamydomonas telomeres and telomerase mutants*

555 any other model organism. The characterization of its telomeres at the level of sequence, end-  
556 structure, length distribution and maintenance by telomerase or alternative mechanisms,  
557 provided by this study is an essential step to propose *C. reinhardtii* as a valuable model  
558 organism for telomere biology research.

559

560 **METHODS**

561

562 A detailed description of the methods used can be found in Supplemental Methods.

563

564 **AUTHOR CONTRIBUTIONS**

565 Conceptualization: SE, SV, FAW, MTT, KR and ZX. Supervision: SE, KR and ZX.

566 Investigation: SE, SV, JR, PJ, SB and ZX. Formal Analysis: all authors. Writing – Original

567 Draft: SE, SDL and ZX. Writing – Review & Editing: all authors.

568

569 **ACKNOWLEDGMENTS**

570 We thank the Chlamydomonas Mutant Library Group at Princeton University, the Carnegie

571 Institution for Science, and the Chlamydomonas Resource Center at the University of

572 Minnesota for providing the indexed Chlamydomonas insertional mutants. This work was

573 supported by the ANR grant “AlgaTelo” (ANR-17-CE20-0002-01) to ZX, la Fondation de la

574 Recherche Médicale (MTT “équipe labellisée”), the ANR grant “InTelo” (ANR-16-CE12-

575 0026) to MTT, the “Initiative d’Excellence” program from the French State (Grant

576 ‘DYNAMO’, ANR-11-LABX-0011) and by the Ministry of Education, Youth and Sports of

577 the Czech Republic, European Regional Development Fund-Project “REMAP” (No.

578 CZ.02.1.01/0.0/0.0/15\_003/0000479) to KR. The authors declare no conflict of interest.

579

580 **REFERENCES**

581 Akimcheva, S., Zellinger, B., and Riha, K. (2008). Genome stability in Arabidopsis cells  
582 exhibiting alternative lengthening of telomeres. *Cytogenet Genome Res* 122:388-  
583 395.

584 Aksenova, A.Y., Han, G., Shishkin, A.A., Volkov, K.V., and Mirkin, S.M. (2015). Expansion of  
585 Interstitial Telomeric Sequences in Yeast. *Cell reports*.

586 Arneric, M., and Lingner, J. (2007). Tel1 kinase and subtelomere-bound Tbf1 mediate  
587 preferential elongation of short telomeres by telomerase in yeast. *EMBO reports*  
588 8:1080-1085.

589 Arora, R., and Azzalin, C.M. (2015). Telomere elongation chooses TERRA ALternatives.  
590 *RNA Biol* 12:938-941.

- 591 Askree, S.H., Yehuda, T., Smolikov, S., Gurevich, R., Hawk, J., Coker, C., Krauskopf, A.,  
592 Kupiec, M., and McEachern, M.J. (2004). A genome-wide screen for  
593 *Saccharomyces cerevisiae* deletion mutants that affect telomere length.  
594 Proceedings of the National Academy of Sciences of the United States of America  
595 101:8658-8663.
- 596 Azzalin, C.M., Nergadze, S.G., and Giulotto, E. (2001). Human intrachromosomal  
597 telomeric-like repeats: sequence organization and mechanisms of origin.  
598 Chromosoma 110:75-82.
- 599 Cesare, A.J., and Reddel, R.R. (2010). Alternative lengthening of telomeres: models,  
600 mechanisms and implications. Nature reviews. Genetics 11:319-330.
- 601 Cetin, B., and Cleveland, D.W. (2010). How to survive aneuploidy. Cell 143:27-29.
- 602 Chang, H.Y., Lawless, C., Addinall, S.G., Oexle, S., Taschuk, M., Wipat, A., Wilkinson, D.J.,  
603 and Lydall, D. (2011). Genome-wide analysis to identify pathways affecting  
604 telomere-initiated senescence in budding yeast. G3 1:197-208.
- 605 Clark, D.J. (2010). Nucleosome positioning, nucleosome spacing and the nucleosome  
606 code. Journal of biomolecular structure & dynamics 27:781-793.
- 607 Cross, F.R., and Umen, J.G. (2015). The *Chlamydomonas* cell cycle. The Plant journal : for  
608 cell and molecular biology 82:370-392.
- 609 Epel, E.S., Blackburn, E.H., Lin, J., Dhabhar, F.S., Adler, N.E., Morrow, J.D., and Cawthon,  
610 R.M. (2004). Accelerated telomere shortening in response to life stress.  
611 Proceedings of the National Academy of Sciences of the United States of America  
612 101:17312-17315.
- 613 Fajkus, J., Sykorova, E., and Leitch, A.R. (2005). Techniques in plant telomere biology.  
614 BioTechniques 38:233-243.
- 615 Forstemann, K., Hoss, M., and Lingner, J. (2000). Telomerase-dependent repeat  
616 divergence at the 3' ends of yeast telomeres. Nucleic acids research 28:2690-  
617 2694.
- 618 Fulcher, N., Derboven, E., Valuchova, S., and Riha, K. (2014). If the cap fits, wear it: an  
619 overview of telomeric structures over evolution. Cellular and molecular life  
620 sciences : CMLS 71:847-865.
- 621 Fulneckova, J., Hasikova, T., Fajkus, J., Lukesova, A., Elias, M., and Sykorova, E. (2012).  
622 Dynamic evolution of telomeric sequences in the green algal order  
623 Chlamydomonadales. Genome biology and evolution 4:248-264.
- 624 Fulneckova, J., Sevcikova, T., Fajkus, J., Lukesova, A., Lukes, M., Vlcek, C., Lang, B.F., Kim,  
625 E., Elias, M., and Sykorova, E. (2013). A broad phylogenetic survey unveils the  
626 diversity and evolution of telomeres in eukaryotes. Genome biology and  
627 evolution 5:468-483.
- 628 Fulneckova, J., Sevcikova, T., Lukesova, A., and Sykorova, E. (2015). Transitions between  
629 the Arabidopsis-type and the human-type telomere sequence in green algae  
630 (clade Caudivolvoxa, Chlamydomonadales). Chromosoma.
- 631 Gallaher, S.D., Fitz-Gibbon, S.T., Glaesener, A.G., Pellegrini, M., and Merchant, S.S. (2015).  
632 *Chlamydomonas* Genome Resource for Laboratory Strains Reveals a Mosaic of  
633 Sequence Variation, Identifies True Strain Histories, and Enables Strain-Specific  
634 Studies. The Plant cell.
- 635 Gaspin, C., Rami, J.F., and Lescure, B. (2010). Distribution of short interstitial telomere  
636 motifs in two plant genomes: putative origin and function. BMC plant biology  
637 10:283.
- 638 Gatbonton, T., Imbesi, M., Nelson, M., Akey, J.M., Ruderfer, D.M., Kruglyak, L., Simon, J.A.,  
639 and Bedalov, A. (2006). Telomere length as a quantitative trait: genome-wide

*Chlamydomonas telomeres and telomerase mutants*

- 640 survey and genetic mapping of telomere length-control genes in yeast. *PLoS*  
641 *genetics* 2:e35.
- 642 Giraud-Panis, M.J., Teixeira, M.T., Geli, V., and Gilson, E. (2010). CST meets shelterin to  
643 keep telomeres in check. *Molecular cell* 39:665-676.
- 644 Gross, C.H., Ranum, L.P., and Lefebvre, P.A. (1988). Extensive restriction fragment length  
645 polymorphisms in a new isolate of *Chlamydomonas reinhardtii*. *Current genetics*  
646 13:503-508.
- 647 Hails, T., Huttner, O., and Day, A. (1995). Isolation of a *Chlamydomonas reinhardtii*  
648 telomere by functional complementation in yeast. *Current genetics* 28:437-440.
- 649 Harley, C.B., Futcher, A.B., and Greider, C.W. (1990). Telomeres shorten during ageing of  
650 human fibroblasts. *Nature* 345:458-460.
- 651 Harris, E.H. (2001). *Chlamydomonas* as a model organism. *Annual Review of Plant*  
652 *Physiology and Plant Molecular Biology* 52:363-406.
- 653 Harris, E.H. (2009). *The Chlamydomonas Sourcebook* (Second Edition). Canada: Elsevier  
654 Academic Press.
- 655 Heacock, M., Spangler, E., Riha, K., Puizina, J., and Shippen, D.E. (2004). Molecular  
656 analysis of telomere fusions in *Arabidopsis*: multiple pathways for chromosome  
657 end-joining. *The EMBO journal* 23:2304-2313.
- 658 Johnston, S.D., Lew, J.E., and Berman, J. (1999). Gbp1p, a Protein with RNA Recognition  
659 Motifs, Binds Single-Stranded Telomeric DNA and Changes Its Binding Specificity  
660 upon Dimerization. *Molecular and cellular biology* 19:923-933.
- 661 Kazda, A., Zellinger, B., Rossler, M., Derboven, E., Kusenda, B., and Riha, K. (2012).  
662 Chromosome end protection by blunt-ended telomeres. *Genes & development*  
663 26:1703-1713.
- 664 Lewis, K.A., and Wuttke, D.S. (2012). Telomerase and telomere-associated proteins:  
665 structural insights into mechanism and evolution. *Structure* 20:28-39.
- 666 Li, X., Zhang, R., Patena, W., Gang, S.S., Blum, S.R., Ivanova, N., Yue, R., Robertson, J.M.,  
667 Lefebvre, P., Fitz-Gibbon, S.T., et al. (2016). An indexed, mapped mutant library  
668 enables reverse genetics studies of biological processes in *Chlamydomonas*  
669 *reinhardtii*. *The Plant cell*.
- 670 Lingner, J., Cech, T.R., Hughes, T.R., and Lundblad, V. (1997a). Three Ever Shorter  
671 Telomere (EST) genes are dispensable for in vitro yeast telomerase activity.  
672 *Proceedings of the National Academy of Sciences of the United States of America*  
673 94:11190-11195.
- 674 Lingner, J., Hughes, T.R., Shevchenko, A., Mann, M., Lundblad, V., and Cech, T.R. (1997b).  
675 Reverse transcriptase motifs in the catalytic subunit of telomerase. *Science*  
676 276:561-567.
- 677 Lodha, M., and Schroda, M. (2005). Analysis of chromatin structure in the control regions  
678 of the *chlamydomonas* HSP70A and RBCS2 genes. *Plant molecular biology*  
679 59:501-513.
- 680 Lundblad, V., and Blackburn, E.H. (1993). An alternative pathway for yeast telomere  
681 maintenance rescues est1- senescence. *Cell* 73:347-360.
- 682 Lundblad, V., and Szostak, J.W. (1989). A Mutant with a Defect in Telomere Elongation  
683 Leads to Senescence in Yeast. *Cell* 57:633-643.
- 684 Marzec, P., Armenise, C., Perot, G., Roumelioti, F.M., Basyuk, E., Gagos, S., Chibon, F., and  
685 Dejudin, J. (2015). Nuclear-receptor-mediated telomere insertion leads to  
686 genome instability in ALT cancers. *Cell* 160:913-927.
- 687 Meyne, J., Baker, R.J., Hobart, H.H., Hsu, T.C., Ryder, O.A., Ward, O.G., Wiley, J.E., Wurster-  
688 Hill, D.H., Yates, T.L., and Moyzis, R.K. (1990). Distribution of non-telomeric sites



- 689 of the (TTAGGG)<sub>n</sub> telomeric sequence in vertebrate chromosomes. *Chromosoma*  
690 99:3-10.
- 691 Millet, C., Ausiannikava, D., Le Bihan, T., Granneman, S., and Makovets, S. (2015). Cell  
692 populations can use aneuploidy to survive telomerase insufficiency. *Nature*  
693 *communications* 6:8664.
- 694 Millet, C., and Makovets, S. (2016). Aneuploidy as a mechanism of adaptation to  
695 telomerase insufficiency. *Current genetics*.
- 696 Nakamura, T.M., Morin, G.B., Chapman, K.B., Weinrich, S.L., Andrews, W.H., Lingner, J.,  
697 Harley, C.B., and Cech, T.R. (1997). Telomerase catalytic subunit homologs from  
698 fission yeast and human. *Science* 277:955-959.
- 699 Oguchi, K., Liu, H., Tamura, K., and Takahashi, H. (1999). Molecular cloning and  
700 characterization of AtTERT, a telomerase reverse transcriptase homolog in  
701 *Arabidopsis thaliana*. *FEBS letters* 457:465-469.
- 702 Palm, W., and de Lange, T. (2008). How shelterin protects mammalian telomeres. *Annual*  
703 *review of genetics* 42:301-334.
- 704 Petracek, M.E., and Berman, J. (1992). *Chlamydomonas reinhardtii* telomere repeats  
705 form unstable structures involving guanine-guanine base pairs. *Nucleic acids*  
706 *research* 20:89-95.
- 707 Petracek, M.E., Konkel, L.M.C., Kable, M.L., and Berman, J. (1994). A *Chlamydomonas*  
708 protein that binds single-stranded G-strand telomere DNA. *The EMBO journal*  
709 13:3648-3658.
- 710 Petracek, M.E., Lefebvre, P.A., Silflow, C.D., and Berman, J. (1990). *Chlamydomonas*  
711 telomere sequences are A+T-rich but contain three consecutive G-C basepairs.  
712 *Proceedings of the National Academy of Sciences of the United States of America*  
713 87:8222-8226.
- 714 Pfeiffer, V., and Lingner, J. (2013). Replication of telomeres and the regulation of  
715 telomerase. *Cold Spring Harbor perspectives in biology* 5:a010405.
- 716 Platt, J.M., Ryvkin, P., Wanat, J.J., Donahue, G., Ricketts, M.D., Barrett, S.P., Waters, H.J.,  
717 Song, S., Chavez, A., Abdallah, K.O., et al. (2013). Rap1 relocalization contributes  
718 to the chromatin-mediated gene expression profile and pace of cell senescence.  
719 *Genes & development* 27:1406-1420.
- 720 Richards, E.J., and Ausubel, F.M. (1988). Isolation of a higher eukaryotic telomere from  
721 *Arabidopsis thaliana*. *Cell* 53:127-136.
- 722 Rochaix, J.D. (1995). *Chlamydomonas reinhardtii* as the photosynthetic yeast. *Annual*  
723 *review of genetics* 29:209-230.
- 724 Romano, G.H., Harari, Y., Yehuda, T., Podhorzer, A., Rubinstein, L., Shamir, R., Gottlieb, A.,  
725 Silberberg, Y., Pe'er, D., Ruppin, E., et al. (2013). Environmental stresses disrupt  
726 telomere length homeostasis. *PLoS genetics* 9:e1003721.
- 727 Sasso, S., Stibor, H., Mittag, M., and Grossman, A.R. (2018). From molecular manipulation  
728 of domesticated *Chlamydomonas*  
729 *reinhardtii* to survival in nature. *eLife:eLife* 2018;2017:e39233.
- 730 Scaife, M.A., Nguyen, G.T., Rico, J., Lambert, D., Helliwell, K.E., and Smith, A.G. (2015).  
731 Establishing *Chlamydomonas reinhardtii* as an industrial biotechnology host. *The*  
732 *Plant journal : for cell and molecular biology* 82:532-546.
- 733 Scranton, M.A., Ostrand, J.T., Fields, F.J., and Mayfield, S.P. (2015). *Chlamydomonas* as a  
734 model for biofuels and bio-products production. *The Plant journal : for cell and*  
735 *molecular biology* 82:523-531.
- 736 Shay, J.W., Reddel, R.R., and Wright, W.E. (2012). Cancer. Cancer and telomeres--an  
737 ALternative to telomerase. *Science* 336:1388-1390.

*Chlamydomonas telomeres and telomerase mutants*

- 738 Uchida, W., Matsunaga, S., Sugiyama, R., and Kawano, S. (2002). Interstitial telomere-like  
739 repeats in the Arabidopsis thaliana genome. *Genes & genetic systems* 77:63-67.  
740 Ungar, L., Yosef, N., Sela, Y., Sharan, R., Ruppin, E., and Kupiec, M. (2009). A genome-wide  
741 screen for essential yeast genes that affect telomere length maintenance. *Nucleic  
742 acids research* 37:3840-3849.  
743 von Zglinicki, T. (2000). Role of oxidative stress in telomere length regulation and  
744 replicative senescence. *Annals of the New York Academy of Sciences* 908:99-110.  
745 Vysotskaia, V.S., Curtis, D.E., Voinov, A.V., Kathir, P., Silflow, C.D., and Lefebvre, P.A.  
746 (2001). Development and Characterization of Genome-Wide Single Nucleotide  
747 Polymorphism Markers in the Green Alga *Chlamydomonas reinhardtii*. *Plant  
748 physiology* 127:386-389.  
749 Walmsley, R.M., and Petes, T.D. (1985). Genetic control of chromosome length in yeast.  
750 *Proceedings of the National Academy of Sciences of the United States of America*  
751 82:506-510.  
752 Watson, J.M., Platzer, A., Kazda, A., Akimcheva, S., Valuchova, S., Nizhynska, V., Nordborg,  
753 M., and Riha, K. (2016). Germline replications and somatic mutation  
754 accumulation are independent of vegetative life span in Arabidopsis. *Proceedings  
755 of the National Academy of Sciences of the United States of America*.  
756 Wellinger, R.J., and Zakian, V.A. (2012). Everything you ever wanted to know about  
757 *Saccharomyces cerevisiae* telomeres: beginning to end. *Genetics* 191:1073-1105.  
758 Wright, J.H., Gottschling, D.E., and Zakian, V.A. (1992). *Saccharomyces* telomeres assume  
759 a non-nucleosomal chromatin structure. *Genes & development* 6:197-210.  
760 Wu, R.A., Upton, H.E., Vogan, J.M., and Collins, K. (2017). Telomerase Mechanism of  
761 Telomere Synthesis. *Annual review of biochemistry*.  
762 Zakian, V.A. (1995). Telomeres: beginning to understand the end. *Science* 270:1601-  
763 1607.  
764 Zellinger, B., Akimcheva, S., Puizina, J., Schirato, M., and Riha, K. (2007). Ku suppresses  
765 formation of telomeric circles and alternative telomere lengthening in  
766 Arabidopsis. *Molecular cell* 27:163-169.  
767  
768

769 **FIGURE LEGENDS**

770

771 **Figure 1: Structural characterization of *C. reinhardtii* telomeres.** (A) Characterization of  
772 *C. reinhardtii* telosomes by MNase digestion of gDNA (left panel; “EtBr”: ethidium bromide  
773 staining of the migration gel) and Southern analysis with a telomeric specific probe (right  
774 panel; (T<sub>4</sub>AG<sub>3</sub>)<sub>3</sub>: radiolabeled probe). The membrane was then stripped and probed again with  
775 an 18S rDNA probe (middle panel). (B) PETRA was used to amplify specific telomeres from  
776 strains T222+ and CC125+, and analyzed by Southern blotting using the telomere-specific  
777 probe (TTTTAGGG)<sub>3</sub> (see also **Supplemental Figure S1C**). (C) T222+ and S24- strains  
778 were subcloned and three subclones were independently grown in liquid cultures until  
779 stationary phase and subsequently analyzed by TRF Southern blot. (D) Genomic DNA was  
780 subjected to *Bal31* digestion for 1 to 10 minutes. Digested products were column-purified and



781 then digested with the restriction enzyme cocktail, separated by electrophoresis and analyzed  
782 by TRF Southern blot. 0: no *Bal31* digestion, but gDNA was column-purified before  
783 digestion by the restriction enzymes. NP: gDNA was directly analyzed by TRF Southern blot,  
784 with No column-Purification. Dashed line: smear corresponding to telomeres. Star: *Bal31*-  
785 insensitive band, corresponding to interstitial telomeric repeat (see also **Supplemental Figure**  
786 **S1F**).

787

788 **Figure 2: Telomere length distribution is stable under various growth conditions. (A)**

789 Telomere length distributions of T222+ strain at different growth stages of liquid cultures.  
790 T222+ cells were harvested at early exponential (1), mid-exponential (2), late exponential (3)  
791 and early (4, 5) and late (6) stationary phases and analyzed by TRF Southern blot. **(B)**  
792 Telomere length distributions of prolonged cultures in stationary phase. Cells were harvested  
793 after 1, 5, 8 and 15 days after reaching stationary phase. **(C)** Telomere length distributions of  
794 serial dilutions of rapidly growing cells. A liquid culture of T222+ cells was grown to  
795 exponential phase ( $2.10^6$  cells/mL), a sample of cells was harvested and the remaining cells  
796 diluted with fresh media to  $5.10^4$  cells/mL. This serial dilution was repeated 10 times.  
797 Samples corresponding to dilutions 1, 3, 6, 8 and 10 were then analyzed by TRF Southern  
798 blot. Plate: cells were directly scraped from one week-old streaks on TAP Petri dishes,  
799 without liquid culture. **(D)** Telomere length distributions in different metabolic growth  
800 conditions. Cells were grown for 6 days to stationary phase either in heterotrophic conditions  
801 in TAP medium in the dark, in mixotrophic conditions in TAP medium in low (LL) or higher  
802 light (HL), or in pure photo-autotrophic conditions in minimum (MIN) medium under HL.

803

804 **Figure 3: Vast differences in telomere length distributions in *C. reinhardtii* reference**

805 **strains. (A)** Telomeres of recently sequenced *C. reinhardtii* reference strains (Gallaher *et al.*,  
806 2015) were analyzed by TRF Southern blot. Strains sharing the same name color are closely  
807 related genetically, while strains with different colors are more divergent. Dashed vertical  
808 lines indicate independent gels. Star: S1D2- strain does not display the band at ~200 bp. cw15  
809 and cw92 indicate mutations that led to cell-wall-less strains. **(B)** Mean and standard  
810 deviation of telomere length for each strain as calculated by analysis of Southern blots from  
811 the indicated number of independent biological replicates biological replicates (N).

812

813 **Figure 4: Identification of the *CrTERT* gene encoding the catalytic subunit of telomerase**  
814 **in *C. reinhardtii*.**

*Chlamydomonas telomeres and telomerase mutants*

815 (A) The protein corresponding to the predicted gene model Cre04.g213652.t1.1 of the  
816 available *C. reinhardtii* nuclear genome harbors an annotated N-terminal domain with  
817 significant similarities to the RNA template-binding domain of telomerases from other  
818 organisms. The C-terminal domain shows strong similarities with the catalytic domain of this  
819 enzyme in other organisms. Mutants tel-m1 (LMJ.RY0402.077111) and tel-m2  
820 (LMJ.RY0402.209904) from the CliP library have reported insertions in either the RNA-  
821 binding or the catalytic domain, respectively. Mutant tel-m4 (LMJ.RY0402.105594) has an  
822 insertion in between these two domains. (B) PSI-blast alignments show strong amino-acid  
823 sequence similarity of the catalytic domain of telomerases from many organisms with the  
824 putative *C. reinhardtii* protein. Similarity score ranges from 0 (light blue) to 9 and \* (red)  
825 indicates identity. *Cr*, *C. reinhardtii*; *At*, *A. thaliana*; *Os*, *O. sativa*; *Zm*, *Z. mays*; *It*, *I.*  
826 *tectorum*. The motifs B', C and E (mB', mC and mE) described in (Lingner et al. 1997,  
827 Ogushi et al. 1999) show strong conservation in *C. reinhardtii*, including two catalytic  
828 aspartates, essential for telomerase function in other organisms (red star). Conservation can  
829 also be observed downstream of mE between *CrTERT* and the other telomerases. (C) The mC  
830 motif of *C. reinhardtii* shows strong sequence similarity with the mC motif containing two  
831 catalytically essential aspartates in yeast and human telomerases (Lingner et al. 1997, Ogushi  
832 et al. 1999).

833

834 **Figure 5: Insertional mutants of the *CrTERT* gene have shorter telomeres.** (A) Mutants  
835 tel-m1 and tel-m2 have shorter telomeres in TRF analyses (three independent subclones are  
836 shown). Control: mutant LMJ.RY0402.239308 from the CliP library, which has an insertion  
837 in a gene unrelated to *CrTERT*. Paromomycin resistance phenotype is indicated (“[Paro<sup>S/R</sup>”];  
838 “S”: sensitive, “R”: resistant). (B) Prolonged liquid cultures of telomerase mutants lead to  
839 rearranged TRF patterns. Cells were cultured in liquid medium for two months before TRF  
840 analysis. Additional bands and slow migrating DNA molecules (red dots and dotted vertical  
841 line, respectively) are indicated for tel-m1 and tel-m2, and are not present in the CC4533-  
842 reference strain TRF pattern. (C) Tetrad analysis of the cross between tel-m1 and T222+  
843 shows a 2:2 co-segregation of paromomycin resistance and shortened telomeres after 21 and  
844 42 days after the cross (see also **Supplemental Figure S5B**). (D) Tetrad analysis of the cross  
845 between tel-m2 and T222+ shows a 2:2 co-segregation of paromomycin resistance and  
846 shortened telomeres after ~80 days after the cross (see also **Supplemental Figure S5C**).

847

848 **Table 1: Frequency of telomeric repeats motifs determined by telomere PCR and**  
849 **sequencing of 32 independent clones**

850

| <b>Sequence</b> | <b>n</b> | <b>freq.</b> |
|-----------------|----------|--------------|
| TTTTAGGG        | 636      | 89.7%        |
| TTTAGGG         | 37       | 5.2%         |
| TTTTTAGGG       | 13       | 1.8%         |
| TTTTGGG         | 8        | 1.1%         |
| Others          | 15       | 2.1%         |

851

## Figure 1

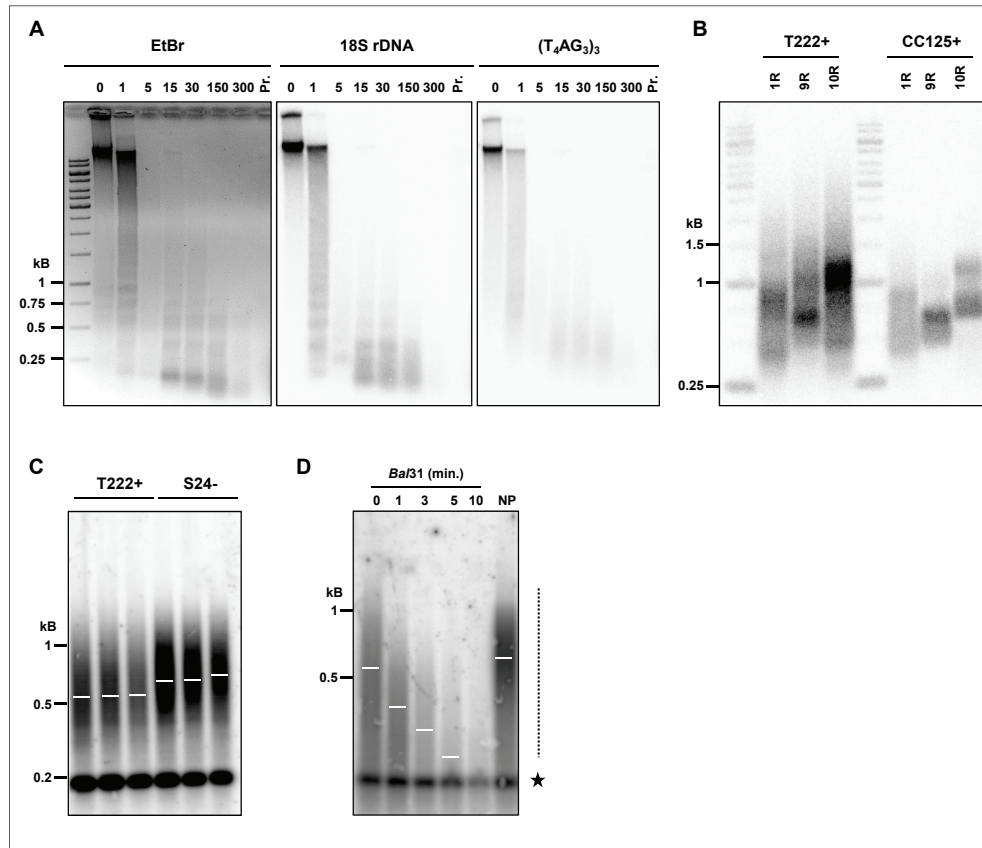

**Figure 1: Structural characterization of *C. reinhardtii* telomeres.** (A) Characterization of *C. reinhardtii* telosomes by MNase digestion of gDNA (left panel; “EtBr”: ethidium bromide staining of the migration gel) and Southern analysis with a telomeric specific probe (right panel;  $(T_4AG_3)_3$ : radiolabeled probe). The membrane was then stripped and probed again with an 18S rDNA probe (middle panel). (B) PETRA was used to amplify specific telomeres from strains T222+ and CC125+, and analyzed by Southern blotting using the telomere-specific probe  $(TTTTAGGG)_3$  (see also **Supplemental Figure S1C**). (C) T222+ and S24- strains were subcloned and three subclones were independently grown in liquid cultures until stationary phase and subsequently analyzed by TRF Southern blot. (D) Genomic DNA was subjected to *BaI31* digestion for 1 to 10 minutes. Digested products were column-purified and then digested with the restriction enzyme cocktail, separated by electrophoresis and analyzed by TRF Southern blot. 0: no *BaI31* digestion, but gDNA was column-purified before digestion by the restriction enzymes. NP: gDNA was directly analyzed by TRF Southern blot, with No column-purification. Dashed line: smear corresponding to telomeres. Star: *BaI31*-insensitive band, corresponding to interstitial telomeric repeat (see also **Supplemental Figure S1F**).

## Figure 2

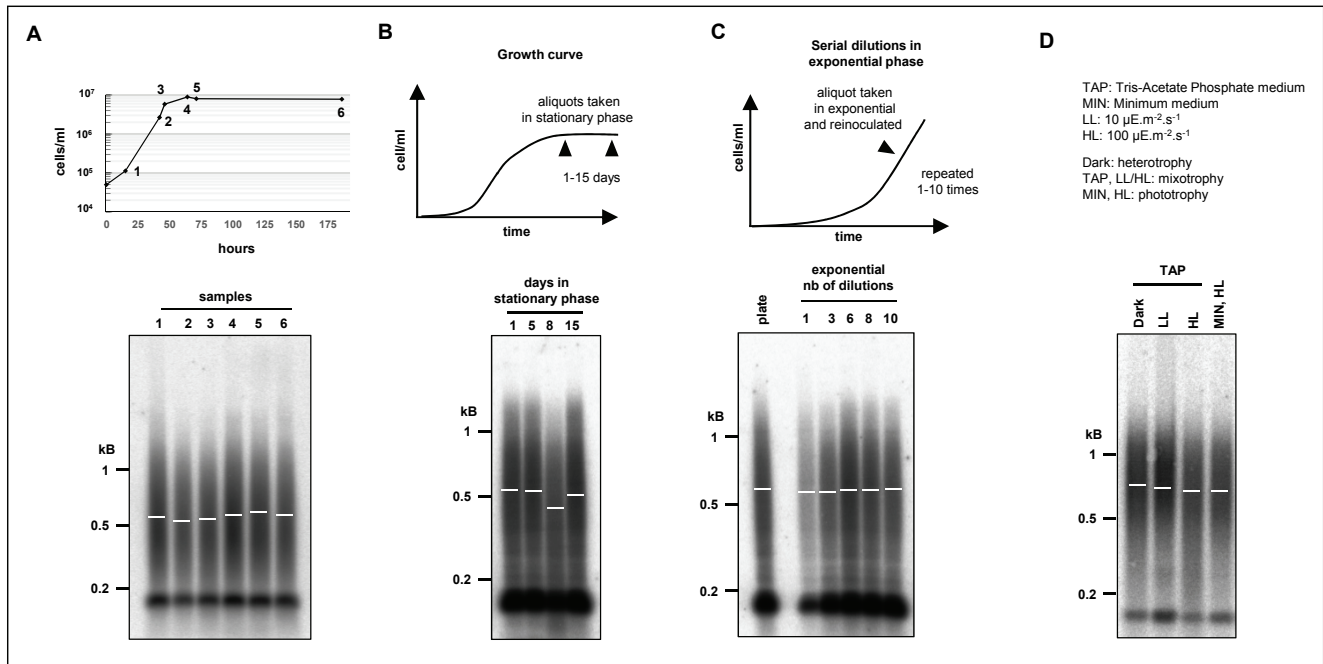

**Figure 2: Telomere length distribution is stable under various growth conditions. (A)** Telomere length distributions of T222+ strain at different growth stages of liquid cultures. T222+ cells were harvested at early exponential (1), mid-exponential (2), late exponential (3) and early (4, 5) and late (6) stationary phases and analyzed by TRF Southern blot. **(B)** Telomere length distributions of prolonged cultures in stationary phase. Cells were harvested after 1, 5, 8 and 15 days after reaching stationary phase. **(C)** Telomere length distributions of serial dilutions of rapidly growing cells. A liquid culture of T222+ cells was grown to exponential phase ( $2 \cdot 10^6$  cells/mL), a sample of cells was harvested and the remaining cells diluted with fresh media to  $5 \cdot 10^4$  cells/mL. This serial dilution was repeated 10 times. Samples corresponding to dilutions 1, 3, 6, 8 and 10 were then analyzed by TRF Southern blot. Plate: cells were directly scraped from one week-old streaks on TAP Petri dishes, without liquid culture. **(D)** Telomere length distributions in different metabolic growth conditions. Cells were grown for 6 days to stationary phase either in heterotrophic conditions in TAP medium in the dark, in mixotrophic conditions in TAP medium in low (LL) or higher light (HL), or in pure photo-autotrophic conditions in minimum (MIN) medium under HL.

## Figure 3

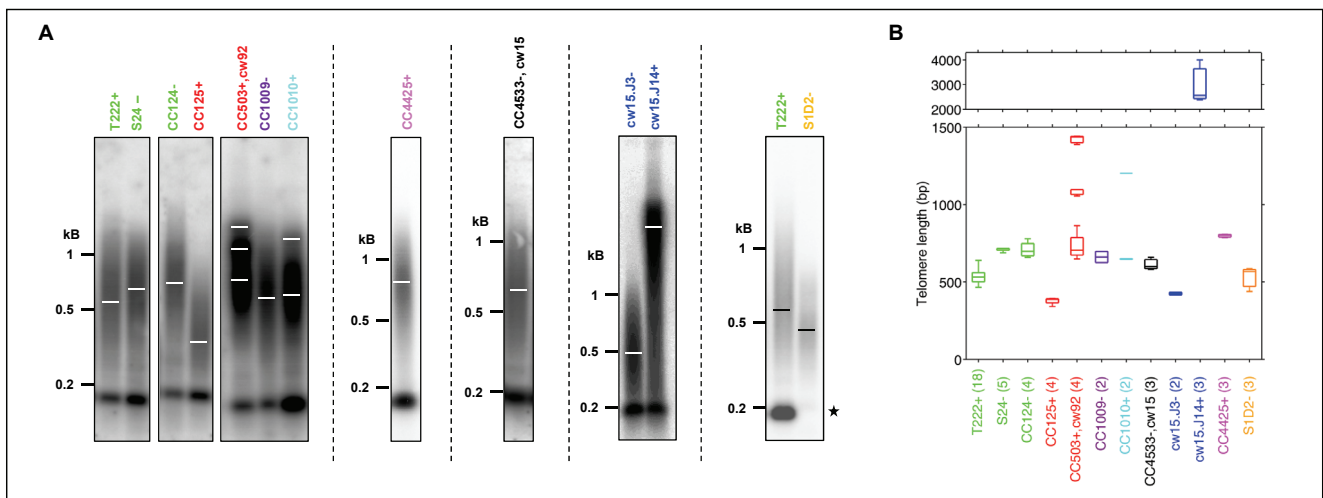

**Figure 3: Vast differences in telomere length distributions in *C. reinhardtii* reference strains. (A)** Telomeres of recently sequenced *C. reinhardtii* reference strains (Gallaher *et al.*, 2015) were analyzed by TRF Southern blot. Strains sharing the same name color are closely related genetically, while strains with different colors are more divergent. Dashed vertical lines indicate independent gels. Star: S1D2- strain does not display the band at ~200 bp. cw15 and cw92 indicate mutations that led to cell-wall-less strains. **(B)** Mean and standard deviation of telomere length for each strain as calculated by analysis of Southern blots from the indicated number of independent biological replicates biological replicates (N).

## Figure 4

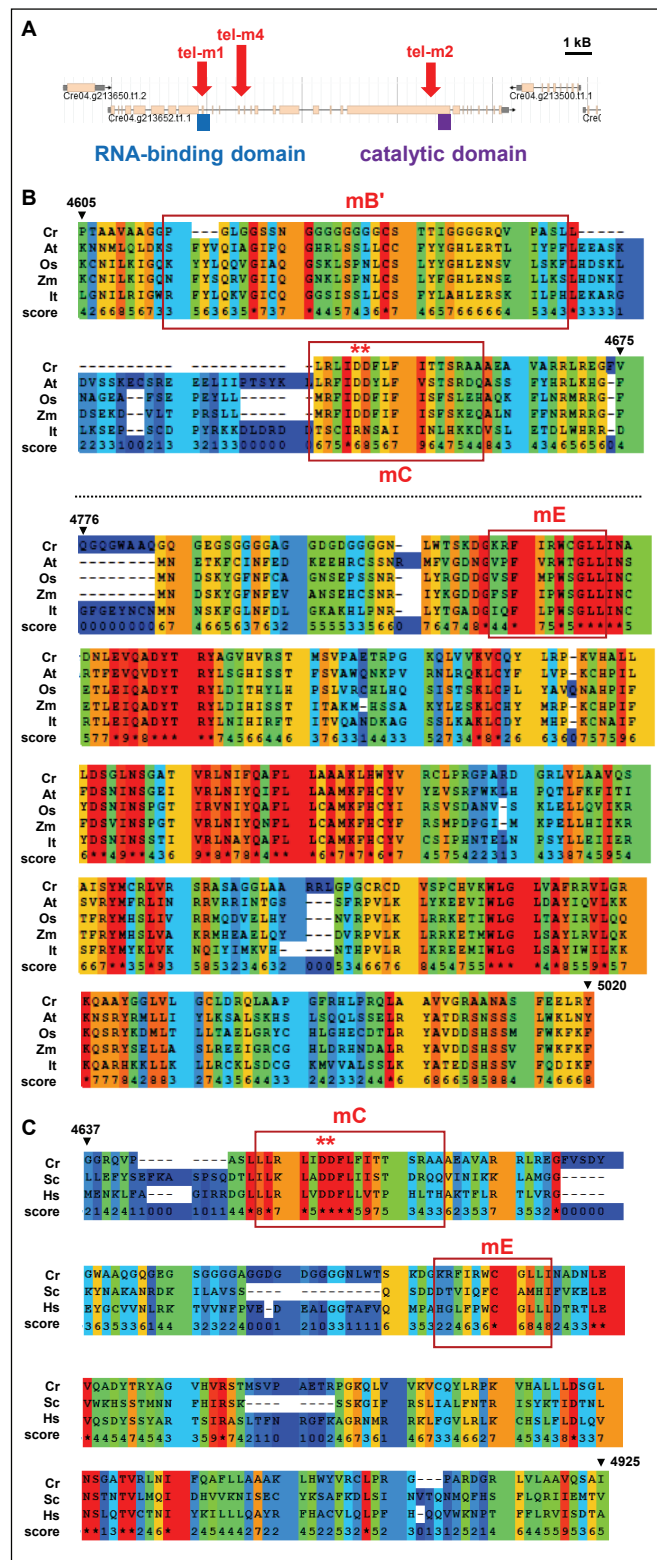



**Figure 4: Identification of the *CrTERT* gene encoding the catalytic subunit of telomerase in *C. reinhardtii*.**

**(A)** The protein corresponding to the predicted gene model Cre04.g213652.t1.1 of the available *C. reinhardtii* nuclear genome harbors an annotated N-terminal domain with significant similarities to the RNA template-binding domain of telomerases from other organisms. The C-terminal domain shows strong similarities with the catalytic domain of this enzyme in other organisms. Mutants tel-m1 (LMJ.RY0402.077111) and tel-m2 (LMJ.RY0402.209904) from the CliP library have reported insertions in either the RNA-binding or the catalytic domain, respectively. Mutant tel-m4 (LMJ.RY0402.105594) has an insertion in between these two domains. **(B)** PSI-blast alignments show strong amino-acid sequence similarity of the catalytic domain of telomerases from many organisms with the putative *C. reinhardtii* protein. Similarity score ranges from 0 (light blue) to 9 and \* (red) indicates identity. *Cr*, *C. reinhardtii*; *At*, *A. thaliana*; *Os*, *O. sativa*; *Zm*, *Z. mays*; *It*, *I. tectorum*. The motifs B', C and E (mB', mC and mE) described in (Lingner et al. 1997, Ogushi et al. 1999) show strong conservation in *C. reinhardtii*, including two catalytic aspartates, essential for telomerase function in other organisms (red star). Conservation can also be observed downstream of mE between *CrTERT* and the other telomerases. **(C)** The mC motif of *C. reinhardtii* shows strong sequence similarity with the mC motif containing two catalytically essential aspartates in yeast and human telomerases (Lingner et al. 1997, Ogushi et al. 1999).

## Figure 5

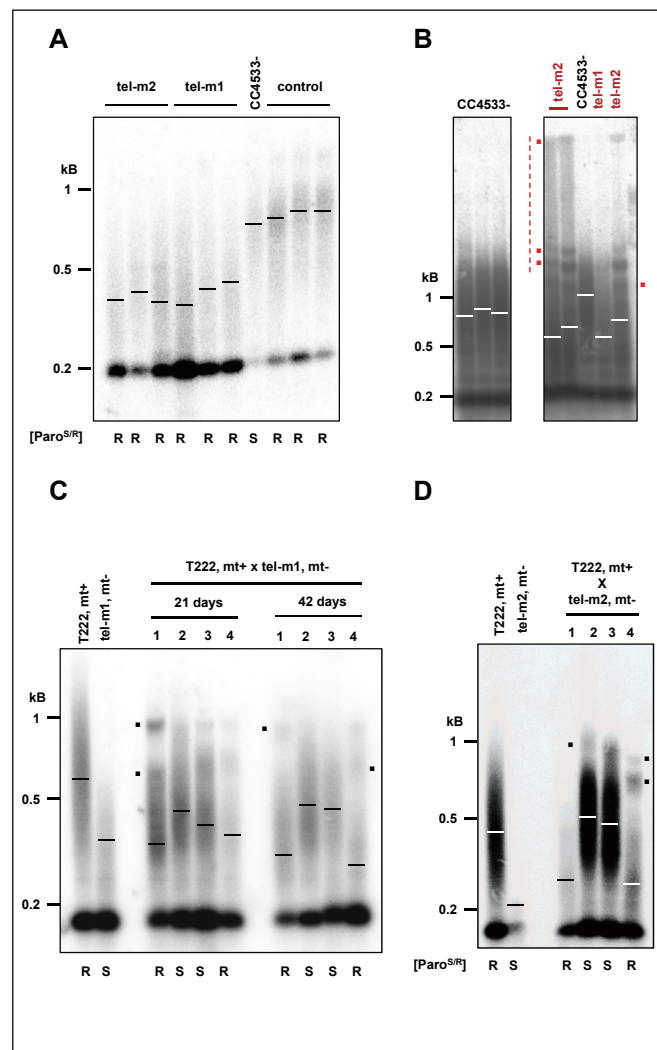

**Figure 5: Insertional mutants of the *CrTERT* gene have shorter telomeres. (A)** Mutants tel-m1 and tel-m2 have shorter telomeres in TRF analyses (three independent subclones are shown). Control: mutant LMJ.RY0402.239308 from the ClIP library, which has an insertion in a gene unrelated to *CrTERT*. Paromomycin resistance phenotype is indicated (“[Paro<sup>S/R</sup>”]; “S”: sensitive, “R”: resistant). **(B)** Prolonged liquid cultures of telomerase mutants lead to rearranged TRF patterns. Cells were cultured in liquid medium for two months before TRF analysis. Additional bands and slow migrating DNA molecules (red dots and dotted vertical line, respectively) are indicated for tel-m1 and tel-m2, and are not present in the CC4533- reference strain TRF pattern. **(C)** Tetrad analysis of the cross between tel-m1 and T222+ shows a 2:2 co-segregation of paromomycin resistance and shortened telomeres after 21 and 42 days after the cross (see also **Supplemental Figure S5B**). **(D)** Tetrad analysis of the cross between tel-m2 and T222+ shows a 2:2 co-segregation of paromomycin resistance and shortened telomeres after ~80 days after the cross (see also **Supplemental Figure S5C**).
